## **Post-acute symptoms four months after SARS-CoV-2 infection during the Omicron period: a nationwide Danish questionnaire study**

Lampros Spiliopoulos<sup>1\*</sup>, Anna Irene Vedel Sørensen<sup>2</sup>, Peter Bager<sup>1,2</sup>, Nete Munk Nielsen<sup>1,3</sup>, Jørgen Vinsløv Hansen<sup>1</sup>, Anders Koch<sup>2,4,5</sup>, Inger Kristine Meder<sup>1</sup>, Poul Videbech<sup>7</sup>, Steen Ethelberg<sup>2,5</sup>, and Anders Hviid<sup>1,6</sup>

1: Department of Epidemiology Research, Statens Serum Institut, 2300 Copenhagen S, Denmark,

2: Infectious Disease Epidemiology and Prevention, Statens Serum Institut, 2300 Copenhagen S, Denmark

3: Focused Research Unit in Neurology, Department of Neurology, Hospital of Southern Jutland, University of Southern Denmark, 6200 Aabenraa, Denmark.

4: Department of Infectious Diseases, Rigshospitalet University Hospital, 2100 Copenhagen Ø, Denmark.

5: Department of Public Health, Global Health Section, University of Copenhagen, 1014 Copenhagen K, Denmark.

6: Pharmacovigilance Research Centre, Department of Drug Design and Pharmacology, University of Copenhagen, 2100 Copenhagen Ø, Denmark

7: Centre for Neuropsychiatric Depression Research, Mental Health Centre Glostrup, 2600 Glostrup, Denmark and University of Copenhagen, Copenhagen, Denmark

\*Correspondence to: Lampros Spiliopoulos (lmsp@ssi.dk)

This manuscript has been removed because it included data obtained through a copyrighted questionnaire. The survey described in the manuscript was launched in haste during the pandemic and the authors were not aware of the copyright protection and acted in good faith. Attempts to obtain permission to use the questionnaire retrospectively were rejected by the copyright holders. The first author was not involved in the decision to include the copyrighted questionnaire, in any other aspects of the design of the survey or in the data collection and therefore bears no responsibility for this mishap. The senior author Anders Hviid takes full responsibility.
